# Supplementary material for: Integrated Analysis of the Effects of Cecal Microbiota and Serum Metabolome on Market Weights of Chinese Native Chickens
Source: Preprints.org preprint supplement (doi:10.20944/preprints202308.0730.v1), 2023-08-09
Supplement: Supplementary file 1 [file supplementary]

## Sheet: S1
Table S1 Body weights of the Guizhou yellow chickens at 18 weeks old used in this study
Number	group	sex	weight(g)										Average weight(g)
			birth	2weeks	4weeks	6weeks	8weeks	10weeks	12weeks	14weeks	16weeks	18weeks
GH2951	LC	F	35.2	154.5	337	512	844.4	1095	1173	1327	1464	1490	Time	LC	HC	P-value（wilcox-test）
GH3047	LC	F	29	130.4	251	553	808.9	1005	1116	1227	1460	1513
GH2802	LC	F	37.5	94.8	190	387	559.5	764	1060	1207	1551	1637	0weeks	33.1812	34.4843	0.665
GH2863	LC	F	36.1	164.7	364	666	922.9	961	1273	1401	1603	1658
GH2923	LC	F	35.1	147.7	318	368	821.8	1014	1231	1334	1600	1675
GH2992	LC	F	32.8	138	310	506	794.8	1028	1221	1427	1646	1726	2weeks	155.131	160.792	0.616
GH2952	LC	F	33.3	149	287	507	776.4	1045	1275	1465	1702	1737
GH3066	LC	F	31.7	140.9	311	582	953.7	1163	1339	1512	1622	1739
GH3015	LC	M	42.2	166.6	421	743	1055.5	1212	1404	1493	1778	1829	4weeks	335.062	345.305	0.22
GH3034	LC	M	31.9	184.2	352	391	870	1181	1273	1415	1756	1856
GH2850	LC	M	31.2	164.8	365	543	906.3	1246	1349	1521	1861	1886
GH2929	LC	M	36.7	178.8	345	690	952.8	1182	1315	1539	1877	1967	6weeks	563.5	592.53	0.132
GH2999	LC	M	32.5	182.5	342	584	933.9	1169	1306	1478	1915	2044
GH3098	LC	M	29.5	163	376	622	903.9	1035	1321	1573	2016	2073
GH3096	LC	M	28.3	159.7	401	642	937.7	1213	1521	1687	2037	2124	8weeks	878.044	922.153	0.023
GH2987	LC	M	27.9	162.5	391	720	1006.2	1084	1316	1574	1992	2129
GH2957	HC	F	34.6	135.8	319	509	823.5	961	1276	1498	1755	1869
GH2876	HC	F	60.6	147.8	321	608	893.3	1098	1276	1477	1840	1897	10weeks	1087.31	1162.01	0.005
GH2874	HC	F	32.5	175.5	374	616	946.9	1252	1417	1574	1851	1943
GH2845	HC	F	32.1	283.1	352	649	934	1134	1506	1663	1884	1948
GH2895	HC	F	27.8	160.7	342	548	900.1	1164	1345	1561	1841	1952	12weeks	1280.81	1390.63	0.000424
GH2899	HC	F	55.9	142.7	219	443	719.9	1016	1243	1475	1891	2011
GH2907	HC	F	32.8	179.6	395	598	974.9	1245	1545	1773	2003	2076
GH2825	HC	F	34.1	165.2	345	713	1059.5	1402	1693	1912	2117	2196	14weeks	1448.75	1596.17	0.00019
GH2931	HC	M	32.2	156.2	344	616	922.7	1175	1365	1600	2050	2265
GH2808	HC	M	25.9	180.1	417	696	1105.1	1308	1562	1904	2202	2279
GH2848	HC	M	31.5	131.3	355	701	1013.4	1308	1563	1941	2131	2310	16weeks	1742.5	1899.35	0.000275
GH2973	HC	M	36.2	179	380	642	976.5	1241	1542	1809	2165	2313
GH3001	HC	M	35.3	144.3	410	748	1037.3	1301	1675	1917	2180	2348
GH3042	HC	M	35.1	160.5	350	752	1075.7	1412	1669	1903	2223	2384	18weeks	1817.69	1997.14	0.000129
GH2917	HC	M	32.5	175.9	401	533	1138.2	1400	1704	2003	2471	2576
GH2872	HC	M	34.8	151.2	375	602	983.3	1445	1736	2035	2452	2638
F:female，M：male

## Sheet: S2
Table S2 Sequencing results of cecal microbiota from Guizhou yellow chickens
Sample_info	Seq_num	Base_num(bp)	Mean_length(bp)	Min_length(bp)	Max_length(bp)
GH2951	54126	22756383	420.433	313	437
GH3047	57384	24130036	420.501	315	457
GH2802	53569	22533133	420.638	281	511
GH2863	42167	17834633	422.952	320	431
GH2923	56899	23837532	418.945	232	436
GH2992	47613	19885840	417.656	217	435
GH2952	58660	24656715	420.333	248	445
GH3066	49581	20691274	417.323	270	506
GH3015	39184	16296261	415.891	270	440
GH3034	55327	23114286	417.776	266	510
GH2850	50722	21145165	416.884	248	504
GH2929	39286	16566021	421.677	270	432
GH2999	34728	14528755	418.359	270	437
GH3098	54069	22620596	418.365	306	437
GH3096	40005	16856462	421.359	278	446
GH2987	62066	25957787	418.229	246	469
GH2957	49084	20460564	416.848	314	500
GH2876	62810	26214641	417.364	311	497
GH2874	62379	25944804	415.922	311	510
GH2845	54647	22757731	416.45	266	512
GH2895	43525	18119377	416.298	245	451
GH2899	52786	21984703	416.487	246	512
GH2907	48670	20266594	416.408	252	456
GH2825	48849	20513573	419.938	279	503
GH2931	44177	18412120	416.781	220	464
GH2808	37574	15729582	418.629	270	435
GH2848	39525	16532586	418.282	309	472
GH2973	41280	17173485	416.024	270	436
GH3001	51192	21538006	420.73	256	433
GH3042	36405	15229215	418.328	318	431
GH2917	34341	14331789	417.338	259	431
GH2872	33311	14068263	422.331	317	469

## Sheet: S3
Table S3 Relative abundance of cecal microbiota at the phylum level
phylum	GH2802	GH3098	GH2951	GH3047	GH3096	GH3034	GH2952	GH2863	GH2929	GH2992	GH2923	GH3066	GH3015	GH2999	GH2850	GH2987	GH2872	GH2825	GH2973	GH2848	GH3001	GH2874	GH2931	GH2845	GH2876	GH3042	GH2917	GH2907	GH2899	GH2808	GH2957	GH2895	mead
Firmicutes	0.51941	0.512649	0.341216	0.561593	0.472681	0.441686	0.380121	0.643886	0.549694	0.585332	0.453186	0.432083	0.520857	0.391629	0.530604	0.44188	0.359037	0.154188	0.570551	0.413937	0.514794	0.455642	0.598137	0.416753	0.376578	0.520957	0.557445	0.269822	0.513679	0.362756	0.54565	0.593692	0.468816
Bacteroidota	0.439779	0.418235	0.583842	0.39515	0.469986	0.531253	0.513998	0.307632	0.409489	0.319502	0.500333	0.428778	0.424555	0.552564	0.394364	0.514035	0.616195	0.682565	0.399516	0.539916	0.448065	0.463086	0.34405	0.544706	0.527209	0.434238	0.394446	0.479267	0.384039	0.567008	0.411503	0.370357	0.462802
Actinobacteriota	0.00221699	0.0176078	0.0291357	0.00500719	0.0153608	0.0067426	0.0076818	0.0214209	0.00662583	0.0783466	0.0245261	0.122301	0.025225	0.0237973	0.0107188	0.0170484	0.00746531	0.142309	0.0199333	0.0331182	0.0112766	0.0621469	0.0150841	0.0245647	0.0750441	0.0156688	0.0249119	0.247269	0.0676295	0.0617457	0.0207428	0.00745245	0.0390664
Desulfobacterota	0.0121708	0.00151791	0.0226725	0.0242478	0.0167756	0.00683371	0.00038409	0.0111004	0.00868859	0.0119682	0.0111439	0	0.0177363	0.00438617	0.0296343	0.0198898	0.0101001	0.00011999	0.000588197	0.00446447	0.000465549	0.0122156	0.00198317	0.000329412	0	0.0160573	0.00442984	0	0.00167595	0.00554308	0.0121523	0.00488881	0.00856762
Synergistota	0.00597231	0.0279296	0.0085663	0.00978256	0.018662	0.00979499	0.00405428	0.00930037	0.0150019	0.00284705	0.00619107	0.00769549	0.00479538	0.0105455	0.0135319	0.00473566	0.00298612	0.00257979	0.00326776	0.00255692	0.00719015	0.000572607	0.0212139	0.00931765	0.0101325	0.00802866	0.0118605	0.000869518	0.014492	0.00217513	0.00277618	0.0121624	0.00848713
Deferribacterota	0.0021265	0.00536329	0.000410362	0.000556354	0.000471603	0.00113895	0.0422926	0.00150006	0.00137517	0.000158169	0	0.00020659	0.000591211	0	0.00281308	0.00086103	0.00237133	0.0150588	0.00424809	0.00344982	0.000362094	0.00125973	0.0102163	0.000282353	0.00212602	0.000906462	0.00209584	0.000652138	0.00497856	0.000420994	0.000576188	0.00131163	0.00344317
Fusobacteriota	0.0136639	0.00414896	0.0123108	0.00032454	0.000202115	0	0.0367019	0	0.000125016	0	0.00142871	0.000774713	0.00433554	0.00032663	0.00421961	0	0	0	0	0	0.0113284	0.000267216	0.000841346	0.000235294	0	0.000172659	0.00071449	0	0.000887268	0	0.000785711	0	0.00293109
Campilobacterota	0.00203601	0.00419955	0	0.00217905	0.000336859	0.000318907	0.00776716	0.00174007	0.000250031	0.000790847	0.00209544	0.00356368	0.000788281	0.00359293	0.00635367	0	0.00158089	0.00179986	0.000980328	0.000243516	0.00253466	0.00282486	0.00480769	0.00112941	0.00461392	0	0.00133371	0.000380414	0.00359836	0	0.00329998	0.0024444	0.00211202
Proteobacteria	0.0026242	0.00455373	0.000974609	0.00032454	0.0021559	0.000637813	0.00699898	0.00342014	0.000375047	0.000527232	0.000380989	0.00144613	0.000591211	0.00317297	0.00300708	0.00103324	0.000263481	0.000299976	0	0.00137993	0.00160356	0.00179417	0.00270433	0.000752941	0.00113086	0.00189925	0.000809755	0.00135862	0.00359836	0	0.000576188	0	0.00157485
Spirochaetota	0	0.0033394	0.000872018	0	0.00141481	9.11162e-05	0	0	0.00793849	0	0	0.0021692	0.000525521	0.00685922	0.000485013	0.000215257	0	0.000539957	0.000196066	0.000933479	0.00212084	0	0	0.00103529	0	0.000345319	0.00119082	0.000163035	0.00177454	0	0.000314284	0	0.00101636
Patescibacteria	0	0	0	0.000463628	0	0.000136674	0	0	0	0.000527232	0.000523859	0.000671418	0	0	0.000630517	0.000129154	0	0	0	0	0.000258639	0	0	0.000188235	0.00167368	0.000820132	0.000619225	0	0.00142949	0.000140331	0.000104761	0.00715436	0.000483479
Verrucomicrobiota	0	0.000101194	0	0.000139089	0.000202115	0	0	0	0.000187523	0	0	0	0	0	0.00121253	0	0	0.000539957	0.000588197	0	0	0.000190869	0.000961538	0.000611765	0.00099516	0	0	0	0.000443634	0.000210497	0.00104761	0.000536577	0.000249008
Cyanobacteria	0	0	0	0.000231814	0	0	0	0	0	0	0	0	0	0.00172647	0.00242507	0	0	0	0	0	0	0	0	0	0.000271407	0.000517978	0	0	0	0	0	0	0.000161648
Elusimicrobiota	0	0	0	0	0	0.00104784	0	0	0	0	0	0	0	0.000979889	0	0.000172206	0	0	0.00013071	0	0	0	0	0	0	0.000172659	0	0	0.00177454	0	0.000209523	0	0.00014023
unclassified_k__norank_d__Bacteria	0	0	0	0	0	0.000318907	0	0	0	0	0.000190494	0.000309885	0	0.000419952	0	0	0	0	0	0	0	0	0	9.41176e-05	0.000226173	0.000215824	0.000142898	0.000217379	0	0	0.000261904	0	7.49229e-05
WPS-2	0	0.000354179	0	0	0.00175167	0	0	0	0.000250031	0	0	0	0	0	0	0	0	0	0	0	0	0	0	0	0	0	0	0	0	0	0	0	7.36212e-05

## Sheet: S4
Table S4 The relative abundance of cecal microbiota at the genus level
genus	GH2802	GH3098	GH2951	GH3047	GH3096	GH3034	GH2952	GH2863	GH2929	GH2992	GH2923	GH3066	GH3015	GH2999	GH2850	GH2987	GH2872	GH2825	GH2973	GH2848	GH3001	GH2874	GH2931	GH2845	GH2876	GH3042	GH2917	GH2907	GH2899	GH2808	GH2957	GH2895	mean
Bacteroides	0.319564	0.26442	0.380867	0.23594	0.253385	0.409203	0.25495	0.209348	0.248531	0.129594	0.297409	0.0919843	0.295277	0.281601	0.20128	0.274625	0.322765	0.456263	0.259329	0.361987	0.313211	0.288556	0.220132	0.219624	0.15814	0.318729	0.187911	0.105592	0.0512644	0.344583	0.154837	0.136708	0.251488
Megamonas	0.179396	0.0736187	0.0685817	0.265195	0.136765	0.00250569	0.0140406	0.450618	0.0459432	0.0663257	0.0316221	0.00123954	0.0174736	0.041342	0.0273547	0.00456346	0.173459	0.00191985	0.0114372	0.0135963	0.288848	0.012292	0.197115	0.00315294	0.016782	0.0855096	0.073783	0.00244552	0.069059	0.0167696	0.110157	0.0725571	0.0804833
Prevotellaceae_UCG-001	0.0364673	0.0490285	0.0616568	0.0463628	0.137641	0.0402733	0.104601	0.0328813	0.0753844	0.0633732	0.032384	0.0746824	0.00584642	0.0691522	0.0149384	0.041846	0.205867	0.0738541	0.0424809	0.036081	0.0732982	0.0495495	0.00558894	0.0936	0.116479	0.0419994	0.0269125	0.0980925	0.04042	0.0709374	0.0245665	0.0287367	0.0598432
Ruminococcus_torques_group	0.0445661	0.0900627	0.0328289	0.0308313	0.0514721	0.0514806	0.0512547	0.0360614	0.0373172	0.0568356	0.0567197	0.0645594	0.0727189	0.0314031	0.037055	0.0470122	0.0411031	0.0522558	0.147768	0.0358781	0.0478999	0.0619942	0.0975361	0.0791059	0.0223459	0.074632	0.0813089	0.054834	0.0836003	0.0498877	0.0795139	0.0955106	0.0592923
Phascolarctobacterium	0.0853316	0.109846	0.0393434	0.0235987	0.103348	0.0559909	0.126024	0.0481219	0.199462	0.173248	0.095009	0.106962	0.0302831	0.0172647	0.0624697	0.0235922	0.0555946	0.0113391	0.0876413	0.0800763	0.00408649	0.0133226	0.0185697	0.00889412	0.0200841	0.0766176	0.0561589	0.0354872	0.0208508	0.0515717	0.00602378	0.0479938	0.059194
unclassified_o__Bacteroidales	0.0385938	0.0126493	0.00610413	0.0578608	0.00518763	0.0452847	0.0463469	0.0178207	0.012189	0.0362208	0.128631	0.108047	0.0516981	0.0139984	0.00674168	0.00266919	0.00210785	0.0759539	0.0471865	0.0918057	0.0154666	0.0477172	0.0530649	0.118729	0.115031	0.0227479	0.124369	0.0532036	0.155765	0.0924081	0.0688806	0.149526	0.0570002
unclassified_f__Lachnospiraceae	0.0437969	0.0699757	0.0443191	0.0631462	0.0414337	0.0661503	0.0232161	0.0138006	0.04038	0.0569937	0.0665778	0.0365148	0.0958418	0.0580934	0.0521874	0.077794	0.0169506	0.0136189	0.0809097	0.0794269	0.0326402	0.123492	0.0625	0.0408	0.0553671	0.0565891	0.0553968	0.0492365	0.0514615	0.0595706	0.0617045	0.0788171	0.055272
Rikenellaceae_RC9_gut_group	0.00126685	0.048725	0.0888946	0.00403357	0.0208179	0.00369021	0.0468163	0.000660026	0.0381298	0.0244635	0.00166683	0.0584134	0.0153715	0.146143	0.146716	0.159377	0.0032496	0.000719942	0.000392131	0.000365275	0.00206911	0.00175599	0.024399	0.0160941	0.000271407	0.000345319	0.00523959	0.120972	0.0627003	0.0159978	0.0494474	0.0030406	0.0347577
Faecalibacterium	0.013302	0.0347096	0.00348807	0.0290231	0.0169777	0.0623235	0.00810857	0.00906036	0.0147518	0.0376971	0.0175731	0.0124471	0.0287723	0.0289767	0.073043	0.0478302	0.00974881	0.0154788	0.0333965	0.0252039	0.0242603	0.0196213	0.0641827	0.112	0.0427466	0.0198558	0.0343908	0.0115211	0.0249421	0.023295	0.046776	0.0400644	0.030799
norank_f__norank_o__Clostridia_UCG-014	0.0237535	0.0173548	0.00861759	0.00927257	0.0151587	0.0225513	0.0660635	0.00726029	0.00612577	0.0135498	0.0153824	0.0465344	0.0280497	0.0450282	0.055631	0.0436542	0.00562094	0.000179986	0.0162734	0.0227688	0.0339851	0.0192778	0.0125601	0.0304471	0.0122133	0.0232227	0.0439173	0.000815173	0.0240548	0.00610441	0.0117333	0.0484708	0.0229885
Parabacteroides	0.00927518	0.0217567	0.00507823	0.0132598	0.012329	0.0103417	0.038537	0.025021	0.0129391	0.0166605	0.0145728	0.023448	0.0164882	0.0136251	0.00679018	0.00779232	0.00570877	0.025618	0.0166002	0.0189943	0.0179495	0.0337838	0.0253606	0.0127059	0.0289953	0.0124746	0.0248166	0.0331504	0.0280475	0.00982318	0.0630664	0.0160973	0.0194096
Bifidobacterium	9.04895e-05	0.00101194	0.00800205	0.000880894	0.0047834	0.00154897	0.00298737	0.00330013	0.000937617	0.0278905	0.00195257	0.083669	0.00026276	0.0041062	0.000194005	0.00146375	0.00237133	0.0287977	0.00810405	0.00722432	0.00118974	0.0543594	0.000901442	0.00211765	0.0330664	0.00530928	0.00871678	0.142057	0.0224774	0.0129105	0.000785711	0.00226555	0.0148668
Olsenella	0.000995385	0.00905687	0.00415491	0.00259632	0.00390757	0.00428246	0.00268863	0.00906036	0.00125016	0.0231982	0.0190971	0.0177668	0.004664	0.0136718	0.00596566	0.010849	0.00447918	0.111651	0.00633945	0.0144486	0.00822471	0.00236677	0.00288462	0.00715294	0.0135704	0.00720853	0.0128132	0.0810825	0.0167595	0.0418187	0.00439998	0.00238479	0.0147122
unclassified_f__Oscillospiraceae	0.0117636	0.0200364	0.0369838	0.0135843	0.00626558	0.0154442	0.00209116	0.00570023	0.00625078	0.0137607	0.00900086	0.00635265	0.0263417	0.0202977	0.0295858	0.021698	0.0061479	0.00293976	0.0130057	0.00913186	0.00962135	0.0208429	0.0230769	0.00781176	0.0238386	0.0131653	0.0160998	0.00608663	0.00897126	0.00757788	0.0145095	0.00804865	0.013626
norank_f__Ruminococcaceae	0.0102706	0.00870269	0.00420621	0.0124716	0.00397494	0.0133941	0.0160038	0.00594024	0.0167521	0.0175041	0.0082865	0.0149778	0.0124811	0.0119453	0.0152779	0.010892	0.00307395	0.00563955	0.0162081	0.0121352	0.00677633	0.0104214	0.0111779	0.0164235	0.0204008	0.0137264	0.0176717	0.00804304	0.0288362	0.00884086	0.0383951	0.0196149	0.0131396
Alistipes	0.00787259	0.00232746	0.00133368	0.00927257	0.00458128	0.0151253	0.00324343	0.00594024	0.00650081	0.0191912	0.00676255	0.00805702	0.0179991	0.00508609	0.00897274	0.00408989	0.00307395	0.012059	0.00803869	0.0133122	0.00677633	0.01275	0.00444712	0.0151059	0.0268241	0.024345	0.0124321	0.0245095	0.0164637	0.00442043	0.0323189	0.0135337	0.011149
Lactobacillus	0.00647	0.00161911	0.015286	0.00579535	0.00848885	0.0166743	0.00507853	0.00888036	0.0848231	0.00896294	0.0163825	0.000258238	0.0206267	0.0142784	0.00839073	0.00766317	0.000439136	0.00209983	0.00594732	0.00401802	0	0.0113376	0.00264423	0.000188235	0.00171891	0.00669055	0.00657331	0.000163035	0.00192241	0.0174712	0.00471426	0.00470995	0.00938488
NK4A214_group	0.00389105	0.00789314	0.00261606	0.00950438	0.00417705	0.00701595	0.00115227	0.00480019	0.0150644	0.00311067	0.00257167	0.00692077	0.0104447	0.018058	0.0222621	0.020923	0.00166872	0.00287977	0.00529377	0.00730549	0.00248293	0.00687128	0.00606971	0.0144471	0.00597096	0.0271075	0.0134324	0.00364111	0.00645734	0.00161381	0.0286522	0.0166339	0.00909167
norank_f__Eubacterium_coprostanoligenes_group	0.00239797	0.00086015	0.000974609	0.00384812	0.00336859	0.0108884	0.00298737	0.00570023	0	0.00680129	0.00266692	0.0263403	0.0059778	0.00541272	0.00654768	0.00981574	0.000966099	0.00467963	0.00934579	0.00450505	0.00418994	0.0214155	0.0047476	0.0101176	0.0137061	0.00820132	0.00881204	0.0267377	0.0245477	0.0133315	0.0108428	0.0119239	0.00852057
Synergistes	0.00597231	0.0279296	0.0085663	0.00978256	0.018662	0.00979499	0.00405428	0.00930037	0.0150019	0.00284705	0.00619107	0.00769549	0.00479538	0.0105455	0.0135319	0.00473566	0.00298612	0.00257979	0.00326776	0.00255692	0.00719015	0.000572607	0.0212139	0.00931765	0.0101325	0.00802866	0.0118605	0.000869518	0.014492	0.00217513	0.00277618	0.0121624	0.00848713
Desulfovibrio	0.0117184	0.000354179	0.0225186	0.0240623	0.0156976	0.00683371	0	0.0111004	0.00868859	0.0119682	0.0111439	0	0.0176049	0.00419952	0.0282763	0.0198898	0.0101001	0	0.000588197	0.00446447	0.000362094	0.0119102	0.00114183	0	0	0.0158847	0.00423931	0	0	0.00554308	0.0120476	0.00488881	0.00828834
Oscillibacter	0.00624378	0.00819672	0.00164145	0.0088553	0.00451391	0.00523918	0.00448105	0.00450018	0.00456307	0.00453419	0.00519097	0.00986468	0.0072916	0.0109654	0.0102823	0.0103754	0.00430353	0.0025198	0.00620874	0.00572263	0.00677633	0.011414	0.00889423	0.00710588	0.0153345	0.00820132	0.0104792	0.00570621	0.00813329	0.00512209	0.00832853	0.00470995	0.00705311
Subdoligranulum	0.0136639	0.00247926	0.00523211	0.00180815	0.00107795	0.014533	0.00179242	0.00276011	0.000312539	0.013339	0.0372416	0.0042351	0.013138	0.00172647	0.0117858	0.00279835	0.00131741	0.00149988	0.00731978	0.00957831	0.0061556	0.00710032	0.00733173	0.000658824	0.00651377	0.00258989	0.00895494	0.00298897	0.0094149	0.0063149	0.00293332	0.0138914	0.00695274
Lachnoclostridium	0	0.00824732	0.0010259	0.00343085	0.0095668	0.00123007	0.00422499	0.00360014	0.0015627	0.00943744	0.00623869	0.00671418	0.00939368	0.0041062	0.00150354	0.00822283	0.00553311	0.00485961	0.0165349	0.00730549	0.00465549	0.0131318	0.00925481	0.0183529	0.00714706	0.00362585	0.00404878	0.00434759	0.00788682	0.0110862	0.0101619	0.0112085	0.00680144
Odoribacter	0.00285042	0.0034912	0.0114901	0.00537809	0.00606346	0.00145786	0.00409696	0.00396016	0.0024378	0.00975378	0.00400038	0.00583617	0.00341588	0.00233307	0.000679018	0.00116239	0.023889	0.00881929	0.00431344	0.00454564	0.00201738	0.00454268	0.000901442	0.0274353	0.00859456	0.00457547	0.00533486	0.0117385	0.00561936	0.00603424	0.00172856	0.0039349	0.00601348
Enorma	0.000316713	0.00116373	0.0110798	0.00152997	0.00653507	0.000273349	0.00162171	0.00132005	0.00218777	0.0187694	0.00233356	0.0135317	0.0201012	0.00191312	0.00227956	0.00107629	0.00061479	0.000719942	0.00287563	0.00629084	0.00118974	0.00397007	0.00691106	0.00221176	0.0204912	0.00198558	0.00104792	0.0202163	0.0162666	0.00231546	0.00738568	0.00208669	0.00570663
norank_f__norank_o__Bacteroidales	0.00438874	0.00293463	0.00559118	0.00931893	0.00384019	0	0.00332878	0	0.00143768	0.00543048	0.00371464	0.0205041	0.00190501	0.00438617	0.00286158	0.00499397	0.00930968	0.0104992	0.0081694	0.00418036	0	0.00397007	0.00234375	0.0297412	0.0132537	0	0	0	0.00695026	0.00456076	0.00303808	0.00554463	0.00550616
unclassified_f__Ruminococcaceae	0.00742014	0.0051103	0.00394973	0.00700079	0.00229064	0.0101595	0.00187777	0	0.00150019	0.00463964	0.0109058	0.00366698	0.0118242	0.00648593	0.0108158	0.00387463	0.00430353	0.000599952	0.00745049	0.00905069	0.00274157	0.00576424	0.00132212	0.00216471	0.00750893	0.00651789	0.0071449	0.00195642	0.00305614	0.0123491	0.00680949	0.00482919	0.00547161
Christensenellaceae_R-7_group	0.00791784	0.00136612	0.00302642	0.00992165	0.000875834	0.0129385	0.00132298	0.000960038	0.00812602	0.00332156	0.00485761	0.00201425	0.0116271	0.00564603	0.0107673	0.0057689	0.00122958	0.000299976	0.00352918	0.00450505	0.00139665	0.00313025	0.00288462	0.00696471	0.00579002	0.0117408	0.0110508	0.000326069	0.00216888	0.00266629	0.00722854	0.0147857	0.00531735
unclassified_f__Tannerellaceae	0.010542	0.00263105	0.00133368	0.00574899	0.0127333	0	0.005676	0.00324013	0.0024378	0.00358517	0.00352415	0.0150294	0	0.00807242	0.000824522	0.00998795	0.00122958	0.00443964	0.00287563	0.000487033	0.00791434	0.00767293	0.00108173	0.000894118	0.0127109	0.0030647	0.00090502	0.0106516	0.00443634	0.00975302	0.000785711	0.00518691	0.00498299
norank_f__Oscillospiraceae	0.00425301	0.00435135	0.0139523	0.00347721	0.00256013	0.00109339	0.00529191	0.00348014	0.00187523	0.00184531	0.0034289	0.00568123	0.0125468	0.00223975	0.00582016	0.00124849	0.00368874	0.00281977	0.00869224	0.00267868	0.00253466	0.00397007	0.00546875	0.00404706	0.00963496	0.00513662	0.00419167	0.00385849	0.00246463	0.00385911	0.00775234	0.00500805	0.00465472
Peptococcus	0.00294091	0.00217567	0.00502693	0.00203996	0.0016843	0.00359909	0.00204848	0.00714029	0.0109389	0.00168714	0.00328603	0.0032538	0.00144518	0.00275302	0.00509264	0.00916997	0	0.00221982	0.0170577	0.00694022	0.00113801	0.00561154	0.000480769	0.00192941	0.00538291	0.00310787	0.0140516	0.00766263	0.00261251	0.0063149	0.000995233	0.00166935	0.00442052
Negativibacillus	0.000814406	0.000961344	0.00543729	0.00171542	0.00195378	0.00246014	0.0075111	0	0.00056257	0.0114936	0.00638156	0.00242744	0.00157656	0.00130652	0.00145504	0.00189427	0.00184437	0.00197984	0.00267956	0.0069808	0.000931099	0.0117575	0.00198317	0.00357647	0.00741846	0.00716536	0.00447747	0.00510842	0.0073446	0.0111563	0.00607616	0.00375604	0.00413084
Butyricicoccus	0.00325762	0.00475612	0.00446268	0.00273541	0.00188641	0.00628702	0.00247525	0.000540022	0.00731341	0.00284705	0.00452424	0.00583617	0.013992	0.0053194	0.00567465	0.0072757	0.00254699	0.00161987	0.00490164	0.00620967	0.000569005	0.00179417	0.00228365	0.00136471	0.00108563	0.00574092	0.00785939	0.00364111	0.00093656	0.00491159	0.00199047	0.00149049	0.00400403
Flavonifractor	0	0.0034406	0	0.00505355	0.00128006	0.00127563	0.0025606	0.00462018	0.00187523	0.00717035	0.000952472	0.00500981	0.00486107	0.00289301	0	0.00236783	0.00131741	0.00257979	0.00477093	0.00361216	0.00346576	0.00748206	0.00432692	0.00470588	0.0178676	0.00366901	0.00285796	0.00195642	0.00660522	0.00315745	0.0101619	0.00375604	0.00392665
norank_f__Muribaculaceae	0.00140259	0.00151791	0.00328289	0.000231814	0.0021559	0	0.00482247	0.0049802	0.00443805	0.00827753	0.00238118	0.0124987	0.000591211	0	0	0	0.00281047	0.000539957	0	0.00300337	0.000724188	0.00500076	0.00522837	0.00197647	0.0324332	0	9.52653e-05	0.00103255	0.00906985	0.00680606	0.00602378	0.00256364	0.00387151
Blautia	0.00135734	0.00131552	0.00389844	0.00662989	0.00323385	0.00309795	0.00290201	0	0.00393799	0.00759213	0.00314316	0.0031505	0.0039414	0.0020531	0.00198855	0.00241088	0.000702617	0.00419966	0.00980328	0.0020293	0.00155183	0.00622232	0.00643029	0.00527059	0.0011761	0.00185609	0.00352482	0.00211945	0.00423917	0.00463093	0.00377141	0.0123413	0.00376631
Megasphaera	0.00334811	0.00106254	0.00846371	0.000927257	0.0355723	0	0.00435302	0	0.00125016	0.000316339	0.00142871	0.020814	0	0.00228641	0	0.000129154	0.00728965	0.00113991	0.00339847	0	0.00589696	0.00389372	0	0.000847059	0.00307595	0.000561143	0.00476327	0.00163035	0.002021	0.00266629	0	0	0.00366048
norank_f__norank_o__Clostridia_vadinBB60_group	0.00429825	0.00546448	0.00164145	0.005239	0.000269487	0.00318907	0.00038409	0.00264011	0.00337542	0.00115991	0.000761977	0.00180766	0.00453262	0.00634595	0.0126103	0.00167901	0	0.000239981	0.00176459	0.000284102	0.00253466	0.000458085	0.00853365	0.00578824	0.0087755	0.00353952	0.00519196	0	0.00512644	0	0.00439998	0.00894294	0.00346808
Mucispirillum	0.0021265	0.00536329	0.000410362	0.000556354	0.000471603	0.00113895	0.0422926	0.00150006	0.00137517	0.000158169	0	0.00020659	0.000591211	0	0.00281308	0.00086103	0.00237133	0.0150588	0.00424809	0.00344982	0.000362094	0.00125973	0.0102163	0.000282353	0.00212602	0.000906462	0.00209584	0.000652138	0.00497856	0.000420994	0.000576188	0.00131163	0.00344317
Sellimonas	0.00113112	0.00278284	0.00148756	0.0012518	0.00181904	0.00168565	0.00238989	0.00186007	0.00175022	0.00390151	0.00209544	0.00366698	0.00361295	0.00158649	0.000873024	0.00206647	0.0019322	0.0050396	0.00614339	0.0032063	0.000620732	0.00839823	0.00108173	0.00357647	0.00425205	0.00284888	0.00442984	0.00755394	0.00507714	0.00792871	0.00429522	0.00155011	0.00318424
Fusobacterium	0.0136639	0.00414896	0.0123108	0.00032454	0.000202115	0	0.0367019	0	0.000125016	0	0.00142871	0.000774713	0.00433554	0.00032663	0.00421961	0	0	0	0	0	0.0113284	0.000267216	0.000841346	0.000235294	0	0.000172659	0.00071449	0	0.000887268	0	0.000785711	0	0.00293109
UCG-004	0	0.000708359	0.00148756	0	0	0	0	0	0	0	0	0	0.00039414	0	0	0.0312554	0	0	0	0.000527619	0	0	0	0	0	0	0	0	0.0463844	0	0	0	0.00252367
Collinsella	0.000361958	0.00475612	0	0	0	0.000501139	0	0.00684027	0.00175022	0.00453419	0.000857224	0.00604276	0	0.00289301	0.00145504	0.0015068	0	0.000599952	0.00169924	0.00296278	0.000569005	0.000877997	0.00396635	0.0119059	0.00592572	0.000345319	0.00166714	0.0026629	0.00409129	0.00385911	0.00701901	0.000417337	0.00250212
Prevotellaceae_Ga6A1_group	0	0.00495851	0.0148756	0	0.0047834	0	0	0	0.00181273	0	0	0	0.0137292	0	0	0	0.0326717	0.00383969	0	0.00284102	0	0	0	0	0	0	0	0	0	0	0	0	0.00248475
Barnesiella	0.00180979	0.000151791	0.00010259	0.0016227	0	0.00268793	0.00140833	0.00216009	0.000625078	0.000474508	0.0026193	0.00562958	0.000722591	0.00219308	0.00150354	0.00180816	0	0.00233981	0.00836547	0.00133934	0.000827643	0.00648954	0.000661058	0.00418824	0.000678518	0.00168343	0.00366771	0.0146188	0.000394341	0.000561325	0.00314284	0.00202707	0.00239076
Bacillus	0.0013121	0.00182149	0.00117979	0.00347721	0.00074109	0.00669704	0.00038409	0.00264011	0.0125016	0.00284705	0.00428612	0.000723066	0.00689746	0.0111987	0.00213406	0.00254004	0	0	0.00411738	8.11721e-05	0.000931099	0.000725302	0	0.000564706	0.00135704	0	0.000333429	0	0.00142949	0	0.00141428	0.000894294	0.00228841
Shuttleworthia	0.00140259	0	0.00117979	0.00241087	0.00289699	0.00305239	0	0.00144006	0.00175022	0.00268888	0.00066673	0.00118789	0.004664	0.00354626	0.00145504	0.00391769	0.000439136	0.00137989	0.00326776	0.00194813	0.00201738	0.00225225	0.00120192	0.00155294	0.00122133	0.00362585	0.00323902	0.00478235	0.00187312	0.00435027	0.00214761	0.00345794	0.00221926
GCA-900066575	0.00144783	0.00293463	0.00189792	0.00180815	0	0.00382688	0.00110959	0.00468019	0.0016252	0	0.000857224	0.0010846	0.00505814	0.00415286	0.00582016	0.00279835	0.000878272	0.000299976	0.00137246	0.00125817	0.00139665	0.00519163	0.00450721	0.00145882	0.00588049	0.00138128	0.00138135	0	0.00108444	0.00063149	0.000995233	0.00190783	0.00214772
Helicobacter	0.00203601	0.00419955	0	0.00217905	0.000336859	0.000318907	0.00776716	0.00174007	0.000250031	0.000790847	0.00209544	0.00356368	0.000788281	0.00359293	0.00635367	0	0.00158089	0.00179986	0.000980328	0.000243516	0.00253466	0.00282486	0.00480769	0.00112941	0.00461392	0	0.00133371	0.000380414	0.00359836	0	0.00329998	0.0024444	0.00211202
norank_f__norank_o__RF39	0.000859651	0.000708359	0.000769428	0.00157634	0	0.00268793	0.00119495	0	0	0.00289977	0.00128584	0.0042351	0.004664	0.00102655	0.00494713	0.00279835	0.000439136	0	0.00137246	0.00190754	0.00160356	0.000343564	0.000661058	0.000188235	0.00149274	0.00828765	0.0141469	0	0.000887268	0.000420994	0.00146666	0.00345794	0.00207278
Eubacterium_hallii_group	0.00285042	0.0016697	0.0010772	0.000741805	0	0.00277904	0	0.00024001	0.00131266	0.00390151	0.00123821	0.00289226	0.00203639	0.00107321	0.000630517	0.000645772	0.000790444	0.00113991	0.00346383	0.000527619	0.000879371	0.000572607	0.00246394	0.00235294	0.00289501	0.000949627	0.00195294	0.00103255	0.0145906	0.000912153	0.00230475	0.00292136	0.0019637
Erysipelatoclostridium	0.00244322	0.000708359	0.0010772	0.00176179	0.000606346	0.0022779	0.00187777	0.000420017	0.000750094	0.00121263	0.0010001	0.000309885	0.00630625	0.00186646	0.00121253	0.00232478	0.000966099	0	0.00117639	0.00409919	0.000465549	0.00397007	0.000961538	0.00122353	0.000949925	0.00293521	0.00195294	0.00010869	0.00123232	0.00161381	0.00487141	0.00149049	0.00169289
norank_f__UCG-010	0.00271469	0.00101194	0.000564247	0.00217905	0	0.00182232	8.53534e-05	0.000120005	0	0.00321611	0.000952472	0.00201425	0.00177363	0.00219308	0.00198855	0.000688824	0.000439136	0.000179986	0.000784262	0.000892893	0.000620732	0.00152695	0.00342548	0.00192941	0.00221649	0.00172659	0.00366771	0.000326069	0.00423917	0.00119282	0.00225237	0.00727359	0.00168807
UCG-005	0.00542937	0	0.00205181	9.27257e-05	0	0.00414579	0.0032861	0	0	0.000105446	0.00195257	0	0.0092623	0.000279968	0.00402561	0.00297055	0.00149306	0.000719942	0.00137246	0.000527619	0.000413822	0.000496259	0.00102163	0.000329412	0.00104039	0.00483446	0.00181004	0	0	0	0.00288094	0.00149049	0.00162602
Alloprevotella	0.00226224	0.000252985	0	0.0036163	0	0.00186788	0	0.000120005	0.000375047	0	0	0.00242744	0	0.00433951	0.000630517	0.0014207	0	0.00479962	0	0	0.00532795	7.63475e-05	0.000120192	0.00169412	0.0111729	0.00297837	0.000952653	0.00347807	0.00187312	0.000420994	0.000261904	0.000357718	0.00158833
Eubacterium_brachy_group	0	0.00131552	0.00164145	0	0.000336859	0	0	0	0.000187523	0.0239363	0.000190494	0.000258238	0.00453262	0	0.00038801	0	0	0	0.000457486	0.0109177	0	0.000381738	0.00114183	0	0.000271407	0.000258989	0	0	0.000837975	0	0.000314284	0	0.00148026
Colidextribacter	0.0017193	0.00435135	0.00159015	0.00338449	0	0.00164009	0	0.00180007	0.0016252	0.000421785	0.000619107	0	0.00144518	0.00139984	0.00475313	0.00154985	0	0.00101992	0	0.001177	0	0.00263399	0.0015024	0.00108235	0	0.00332369	0.00238163	0.000489104	0.00157736	0	0.00167618	0.000953914	0.00137866
Fournierella	0.00280518	0	0.000820723	0	0	0.000455581	0	0	0	0.000949017	0.00442899	0.000516476	0.00039414	0.00149316	0.000679018	0	0	0	0.00385596	0.00527619	0.000310366	0.000190869	0.0078726	0	0	0.000992791	0	0.000434759	0.00138019	0	0.00314284	0.00339832	0.00123116
CHKCI001	0.000361958	0	0.000615542	0.00180815	0	0.00341686	0	0	0	0.000263616	0.0010001	0.000103295	0.00584642	0.000233307	0.00475313	0.000645772	0	0	0	0	0	0	0.000120192	0	0	0.00397117	0.00423931	0	0	0	0.00303808	0.00876409	0.00122441
Pseudoflavonifractor	0.00104063	0.00121433	0.00251346	0.000788168	0.00101058	0.00100228	0.000341413	0	0	0.00121263	0	0.000929656	0.0026276	0.00139984	0	0.000947133	0	0.000419966	0	0.000689963	0	0.0023286	0.00180288	0.000658824	0.00135704	0.00116545	0.00109555	0	0.00142949	0.00175414	0.00439998	0.00172897	0.00105808
Sphaerochaeta	0	0.0033394	0.000872018	0	0.00141481	9.11162e-05	0	0	0.00793849	0	0	0.0021692	0.000525521	0.00685922	0.000485013	0.000215257	0	0.000539957	0.000196066	0.000933479	0.00212084	0	0	0.00103529	0	0.000345319	0.00119082	0.000163035	0.00177454	0	0.000314284	0	0.00101636
Faecalitalea	0	0.000758956	0.000153886	0	0.000134744	0	0.000725504	0.000420017	0.000812602	0.000896294	0.00276217	0.000258238	0	0.00107321	0	0.000172206	0	0	0.00294098	0.00418036	0.000775916	0.00148878	0.000480769	0.000847059	0.000949925	0.000776967	0.00252453	0.000434759	0	0.00063149	0.00288094	0.000357718	0.000857438
unclassified_f__Butyricicoccaceae	0	0	0	0	0	0.00182232	0.00115227	0	0	0.00200348	0.00200019	0	0	0.00107321	0.00130954	0.0013346	0	0	0.00137246	0.00462681	0.00108628	0.00030539	0.000661058	0	0	0.000863297	0.00123845	0	0	0	0.00230475	0.00184821	0.000781322
Anaerostipes	0	0.000404776	0	0.000788168	0.000269487	0.0014123	0	0.000120005	0	0.000316339	0.000333365	0.000981304	0.000656901	0.000186646	0.00164904	0.000473566	0.000439136	0.00131989	0.00117639	0.000121758	0	0.000190869	0.0015625	0.000329412	0.000542814	0.000431648	0.000666857	0.00434759	0.00300685	0.00063149	0.000366665	0.00166935	0.000762348
Eubacterium_nodatum_group	0.000407203	0	0.000769428	0.00101998	0	0.000501139	0.00051212	0.000420017	0.000437555	0.00126536	0.0010001	0.00175602	0.000591211	0.000653259	0.000824522	0	0.000702617	0	0.000914973	0.000811721	0.000155183	0.00255764	0.000661058	0.00103529	0.00153797	0.000302154	0.000285796	0.000869518	0.00187312	0.00147348	0.000995233	0	0.000760427
unclassified_f__Prevotellaceae	0.00217175	0.00111313	0.00112849	0.00203996	0.00316648	0	0	0.00114005	0.000312539	0.000210893	0.000761977	0.00118789	0	0	0	0	0.00351309	0.00107991	0	0.000324689	0.00196565	0	0.000480769	0	0.00099516	0	0	0	0.000345049	0	0	0.00155011	0.000733987
Monoglobus	0.0017193	0.000758956	0.000615542	0.000695443	0	0.00100228	0.000341413	0	0.000625078	0	0.000142871	0.000103295	0.000525521	0	0.000339509	0.000559669	0	0.000299976	0.00124175	0.00243516	0.000103455	0.000763475	0.00108173	0.000847059	0.00113086	0.000992791	0.000857388	0.000217379	0.00138019	0.000841987	0.00172856	0.00172897	0.000721238
Marvinbryantia	0.000407203	0	0	0.00166906	0.000538975	0.000728929	0.000341413	0	0.000875109	0.0013708	0.00109534	0.00185931	0	0.00032663	0.000970026	0.000645772	0	0	0.0013071	0.000243516	0.000258639	0.000343564	0.000721154	0.00122353	0.00199032	0.000690638	0.00109555	0	0.000492927	0.00154364	0.00109999	0.00119239	0.000719736
DTU089	0	0.000354179	0	0.000556354	0.000404231	0	0.000298737	0	0.000437555	0.00189803	0.000714354	0.00103295	0	0.000933228	0.000436512	0	0	0.000479962	0.00176459	0.001177	0.000569005	0.000572607	0	0	0.00239743	0.000992791	0.000523959	0.00222814	0.000542219	0.000841987	0.00167618	0.000834675	0.000677084
Family_XIII_AD3011_group	0	0.000455373	0	0	0.000404231	0.000318907	0	0	0.000437555	0.000949017	0.000761977	0.00154943	0.000656901	0.000979889	0.00072752	0.000817978	0	0.000299976	0	0.000771135	0.000310366	0.000343564	0	0.00291765	0.000814222	0.000431648	0.000523959	0.000543449	0.00369695	0	0.0013619	0.00137125	0.000670151
unclassified_f__Anaerovoracaceae	0.000542937	0	0.000153886	0.000788168	0.000471603	0.000865604	0	0.000660026	0	0.00105446	0.000190494	0.00149778	0.000591211	0.000419952	0.000291008	0.000516618	0.00061479	0	0.000522842	0.000324689	0.000103455	0.00091617	0.000540865	0.000658824	0.00158321	0.000345319	0.000381061	0.00119559	0.00138019	0.000841987	0.00188571	0.00172897	0.000658357
Parasutterella	0.000407203	0.00156851	0.000410362	0.000231814	0.000336859	0.000318907	0.000298737	0.00300012	0.000250031	0.000421785	0	0.000309885	0.000591211	0.000839905	0.00135804	0.00086103	0.000263481	0.000299976	0	0.000649377	0.000310366	0.000152695	0.00222356	0.000611765	0.000678518	0.000561143	0.000523959	0	0.00285897	0	0.000576188	0	0.000653575
Paludicola	0.0013121	0.000202388	0.000205181	0.00101998	0.000471603	0.00168565	0.000298737	0.00150006	0	0	0.00133346	0.00020659	0	0.000186646	0.00130954	0.000129154	0	0.000239981	0.000196066	0.000527619	0.00134492	0.00179417	0.000721154	0.000470588	0	0.000647473	0.00152425	0	0	0	0.000995233	0.000238479	0.000580032
norank_f__Flavobacteriaceae	0	0.000252985	0	0.000463628	0	0.000637813	0.000170707	0.000360014	0.000125016	0.000527232	0.000285741	0.000258238	0.00026276	0.000699921	0.00072752	0.000344412	0	0.000359971	0.000653552	0.000365275	0	0.000419911	0.000240385	0.00230588	0.000361876	0.000647473	0.000857388	0.000815173	0.000690097	0.000280662	0.00340475	0.00131163	0.000557188
norank_f__norank_o__Oscillospirales	0.000678672	0.000151791	0.000615542	0.00101998	0.000269487	0.00159453	0	0	0.000687586	0	0.00066673	0.000103295	0.000919661	0.000746582	0.00324959	0.000473566	0.000263481	0	0	0.000243516	0.000258639	0.000190869	0	0.000188235	0.000226173	0.000906462	0.00138135	0	0	0	0.000576188	0.00107315	0.000515159
norank_f__norank_o__Saccharimonadales	0	0	0	0.000463628	0	0.000136674	0	0	0	0.000527232	0.000523859	0.000671418	0	0	0.000630517	0.000129154	0	0	0	0	0.000258639	0	0	0.000188235	0.00167368	0.000820132	0.000619225	0	0.00142949	0.000140331	0.000104761	0.00715436	0.000483479
unclassified_f__Coriobacteriaceae	0	0	0.00579636	0	0	0	0	0	0	0.00231982	0	0	0	0.000559937	0	0.00198037	0	0	0	0	0	0	0	0	0	0	0	0	0.00473209	0	0	0	0.000480893
Intestinimonas	0	0.0016697	0.000512952	0	0	0.000592255	0	0	0.000375047	0	0.000523859	0.00134284	0.00413847	0.000699921	0.00135804	0.000645772	0	0	0	0.000852307	0	0.000458085	0	0	0	0	0	0	0	0	0.00151904	0.000417337	0.000472051
Anaerotruncus	0.000180979	0.00050597	0.000205181	0.000695443	0	0.000410023	0.0025606	0	0	0.000579955	0.000809601	0.000361533	0	0.00032663	0.00038801	0.000258309	0	0.000659947	0.000326776	0.000527619	0.000155183	0.00133608	0.000600962	0.000611765	0.00113086	0.000345319	0.000571592	0.000326069	0	0.000912153	0	0	0.00046208
norank_f__Peptococcaceae	0.000904895	0.000252985	0.000256476	0.000509991	0	0.000546697	0	0	0.000625078	0	0.000523859	0.000774713	0.00105104	0.000839905	0.000776021	0.000215257	0	0	0	0.000162344	0.000465549	0.000152695	0.000600962	0.000141176	0.000768987	0.00120862	0.000857388	0	0.000443634	0.000771821	0.000523807	0.00131163	0.000458923
Ruminococcus_gauvreauii_group	0.000588182	0.000303582	0	0	0.000269487	0	0	0	0.000312539	0.000896294	0.00109534	0	0	0.000466614	0.000533514	0	0	0	0	0.00020293	0.000465549	0.000839823	0.000721154	0.00136471	0.000814222	0	0.000381061	0.000923863	0.00118302	0.00112265	0.000995233	0.000775055	0.000445463
Faecalicoccus	0	0	0.0010259	0	0.000269487	0	0	0	0.000875109	0	0.000809601	0.000154943	0	0.000699921	0.000582016	0.00335802	0	0	0	0	0	0.00030539	0	0	0.00144751	0	0	0.000163035	0.00384483	0	0	0.000655816	0.000443487
UCG-009	0.000588182	0.000202388	0.000307771	0.000185451	0.000943206	0.000410023	0	0	0.000312539	0	0.000142871	0.000516476	0.0013138	0.000513275	0.00072752	0.000731875	0	0	0.000522842	0.000608791	0.000258639	0.000458085	0	0.000282353	0.00104039	0.000517978	0.00138135	0.000815173	0.000690097	0	0.000680949	0	0.000442251
Oscillospira	0.00140259	0	0.000718133	0.000556354	0.000875834	0.000592255	0	0	0.000437555	0	0.000285741	0	0.00223346	0.000419952	0.00344359	0.000344412	0.000790444	0	0	0.000284102	0	0	0	0	0.000180938	0.000474813	0	0	0	0	0	0.000357718	0.000418684
Butyricimonas	0.000226224	0	0.000974609	0	0.000134744	0.000273349	0	0	0	0.000263616	0.000476236	0	0	0.000933228	0.000145504	0.00159291	0	0.00137989	0.000784262	0	0.000517277	0.000801649	0	0.000611765	0.00126657	0.000647473	0.000285796	0.00141297	0	0.000420994	0	0.000238479	0.00041836
Sutterella	0	0.0017709	0.000205181	0	0.000134744	0	0.00559065	0.000420017	0	0	0	0	0	0.00102655	0	0	0	0	0	0.000649377	0.000827643	0.000877997	0	0	0	0	0	0	0.000591512	0	0	0	0.000377955
unclassified_c__Clostridia	0.000135734	0.000101194	0	0.00143725	0	0.00022779	0	0	0	0	0.000190494	0.00041318	0.000525521	0.000233307	0	0.000258309	0	0.000179986	0	0	0.00160356	0.00141243	0.000240385	0.00258824	0.000135704	0.000345319	0.000190531	0	0	0.000140331	0.00120476	0.000238479	0.000368828
unclassified_f__Rikenellaceae	0	0.00202388	0	0	0.00316648	0	0	0	0.00181273	0.00121263	0	0.000774713	0.00124811	0	0	0.00107629	0	0	0	0	0	0	0	0	0	0	0	0	0	0	0	0	0.000353588
unclassified_c__Bacilli	0	0	0	0	0	0	0	0	0.00425053	0	0	0	0	0.000606598	0	0	0	0	0	0.000446447	0	0	0	0	0	0.00138128	0	0	0	0.00273646	0	0.00137125	0.000337268
Romboutsia	0.000271469	0	0	0.000139089	0	0	0	0	0	0	0.00252405	0.000516476	0	0	0	0	0	0.000239981	0.000784262	0.000730549	0	0.00148878	0	0.000329412	0.000588049	0	0	0	0.000788682	0	0	0.00137125	0.000305376
Anaerofilum	0.00117636	0.000151791	0	0.000185451	0	0	0.00132298	0	0	0.000210893	0.000619107	0.000464828	0	0	0.000776021	0	0	0	0.000914973	0.000649377	0	0	0	0.000329412	0	0.000215824	0.00071449	0.000815173	0	0.000280662	0	0.000417337	0.000288896
Family_XIII_UCG-001	0.000316713	0.000607165	0.000256476	0.000278177	0.000336859	0.000774487	0	0	0.00056257	0	0.000142871	0	0.00032845	0.000233307	0.000679018	0.00030136	0	0	0.000261421	0	0.000362094	0.000496259	0	0	0.00049758	0.000129495	0.000476327	0.000380414	0.000295756	0	0.000366665	0.000834675	0.000278692
norank_f__Erysipelotrichaceae	0	0.000758956	0	0.000278177	0	0.000273349	0	0	0	0.000421785	0	0.00020659	0.00026276	9.33228e-05	0	0.000602721	0	0	0.000261421	0.000162344	0	0.000496259	0.00102163	0	0.000316642	0.000172659	0	0.000434759	0.00113373	0	0.00183332	0.000178859	0.000278415
Slackia	9.04895e-05	0.000607165	0	0	0	0	0.000298737	0	0.000312539	0.00084357	0	0.000464828	0	0.00032663	0.000242507	0	0	0.00011999	0.000261421	0.000933479	0	7.63475e-05	0.000420673	0.000376471	0.000768987	0.000172659	0.000190531	0.000271724	0.000591512	0.000350828	0.000576188	0	0.00025929
V9D2013_group	0	0.000303582	0	0.000417266	0	0.000182232	0	0.000360014	0	0.000210893	0.000190494	0	0.000525521	0.000419952	0.000436512	0	0	0	0.000392131	0.000365275	0	0.000267216	0.000240385	0.000423529	0.000678518	0.000561143	0.000762123	0.000434759	0.000345049	0.000280662	0.000314284	0	0.000253486
Lachnospiraceae_FCS020_group	0.000678672	0.000354179	0	0	0	0.000501139	0	0.000180007	0.000437555	0	0.000333365	0.000929656	0	0	0.000582016	8.6103e-05	0	0	0	0.000121758	0.000206911	0.000267216	0.000120192	0.000705882	0.000226173	0.000129495	0.000571592	0	0	0	0.000523807	0.000596196	0.000235997
unclassified_o__Oscillospirales	0.000226224	0.000101194	0	0.00032454	0.000134744	0.000136674	0.00076818	0.000120005	0	0.000210893	0	0	0	0.000139984	0	0.000344412	0	0	0.000196066	0.000243516	0.000206911	0.000419911	0.000300481	0.000141176	0.00176415	0.000302154	0.000333429	0	0.00093656	0	0.000104761	0	0.000232999
Enterorhabdus	9.04895e-05	0.000809553	0	0	0	0.000136674	0	0	0.000187523	0.000210893	0	0.000258238	0.00019707	0.00032663	0.000145504	0	0	0.000419966	0	0.000568205	0	0.000343564	0	0.000517647	0.000316642	0.000302154	9.52653e-05	0.000434759	0.00167595	0	0.000314284	0	0.000229719
Enterococcus	0	0	0	0	0	0	0.00170707	0	0	0	0.000761977	0.00144613	0	0	0	0.000387463	0	0.000659947	0.000718907	0.000243516	0.000413822	0	0	0	0	0	0	0.000489104	0	0	0.000209523	0	0.000219921
Escherichia-Shigella	0.000271469	0.00050597	0	0	0.0016843	0	0.000810857	0	0	0	9.52472e-05	0.00113625	0	0	0.000873024	0	0	0	0	0	0	0.000114521	0	0	0	0	0	0.00135862	0	0	0	0	0.00021407
CHKCI002	0	0.000202388	0	0	0	0	8.53534e-05	0.000600024	0	0.000316339	0.000285741	0.000568123	0	0	0.000242507	0.000172206	0	0	0.000653552	0.000487033	0	0.000152695	0	0.000282353	0.000588049	0	0.000381061	0	0.000788682	0.000280662	0.000261904	0.000298098	0.000207712
Succinatimonas	0.00185504	0.000455373	0.000359066	0	0	0.000182232	0.000298737	0	0	0.000105446	0.000142871	0	0	0.000466614	0	0.000172206	0	0	0	0	0.000465549	0.000229043	0.000480769	0.000141176	0.000226173	0.000431648	0	0	0.000147878	0	0	0	0.000192494
Mailhella	0.000452448	0.000910747	0.000153886	0.000185451	0.000538975	0	0	0	0	0	0	0	0	0.000186646	0.000679018	0	0	0	0	0	0.000103455	0	0.000721154	0.000188235	0	0	0.000190531	0	0.00113373	0	0.000104761	0	0.000173407
norank_f__norank_o__Gastranaerophilales	0	0	0	0.000231814	0	0	0	0	0	0	0	0	0	0.00172647	0.00242507	0	0	0	0	0	0	0	0	0	0.000271407	0.000517978	0	0	0	0	0	0	0.000161648
unclassified_f__Peptostreptococcaceae	0	0	0	0	0	0	0	0	0	0	0	0	0	0	0.000873024	0	0	0	0.00104568	0	0	0.00297755	0	0	0	0	0	0	0	0	0	0	0.000153008
unclassified_f__Christensenellaceae	0	0.000303582	0	0.000417266	0	0.000318907	0	0.000300012	0.000375047	0	0.000238118	0	0	0.000186646	0.000485013	0	0	0	0	0	0.000155183	0.000114521	0	0.000141176	0.000135704	0.000517978	0.000381061	0	0.000394341	0	0.000366665	0	0.000150976
Elusimicrobium	0	0	0	0	0	0.00104784	0	0	0	0	0	0	0	0.000979889	0	0.000172206	0	0	0.00013071	0	0	0	0	0	0	0.000172659	0	0	0.00177454	0	0.000209523	0	0.00014023
Eubacterium_oxidoreducens_group	0	0	0	0	0	0	0	0	0	0	0	0	0	0	0	0	0	0	0.00392131	0	0	0	0	0	0	0	0	0	0	0	0.000157142	0	0.000127452
Oribacterium	0	0.000202388	0	0	0.000808462	0	0	0	0.000125016	0.000316339	0.000619107	0	0	0	0	0	0	0	0	0	0	0.00148878	0	0	0	0	0	0	0	0.000491159	0	0	0.000126601
Ruminococcus	0.000135734	0	0	0	0	0	0	0	0	0	0	0	0	0	0.00223106	0.000387463	0	0	0	0	0	0	0.000180288	0	0	0	0.000762123	0	0	0	0	0	0.000115521
Eubacterium_ventriosum_group	0.000542937	0	0	0	0	0.000683371	0	0	0.000437555	0	0	0	0.000722591	0.000139984	0.000436512	0	0	0	0	0	0	0	0	0	0	0	9.52653e-05	0	0	0	0.000314284	0.000238479	0.000112843
Papillibacter	0	0	0	0.000185451	0	0.00022779	0	0	0	0.000158169	0	0	0	0.000233307	0.000242507	0	0	0	0	0.000121758	0.000206911	0.000229043	0	0	0	0.000474813	0.000619225	0	0	0	0.000209523	0	9.08905e-05
norank_f__Victivallaceae	0	0	0	0.000139089	0	0	0	0	0	0	0	0	0	0	0.000194005	0	0	0.000299976	0.000261421	0	0	0	0	0.000611765	0.000678518	0	0	0	0	0.000210497	0.000419046	0	8.79474e-05
norank_f__Desulfovibrionaceae	0	0.000252985	0	0	0.000538975	0	0.00038409	0	0	0	0	0	0.00013138	0	0.000679018	0	0	0.00011999	0	0	0	0.00030539	0	0	0	0	0	0	0.000394341	0	0	0	8.76928e-05
norank_f__Barnesiellaceae	0.00108587	0	0	0	0	0.000410023	0	0	0	0	0	0	0	0	0.000582016	0	0	0	0	0	0	0	0	0	0	0	0.000666857	0	0	0	0	0	8.57741e-05
ASF356	0	0	0	0	0	0	0.00106692	0	0	0	0	0	0	0	0	0.00030136	0	0	0.000457486	0.000121758	0	0	0	0	0	0	0	0	0.000788682	0	0	0	8.55064e-05
Lachnospiraceae_UCG-010	0	0	0	0	0	0	0	0	0	0	0	0	0	0.000279968	0.00072752	0	0	0	0	0	0.000413822	0.000572607	0	0	0	0.000302154	0.000333429	0	9.85853e-05	0	0	0	8.52526e-05
Oxalobacter	9.04895e-05	0.000252985	0	9.27257e-05	0	0	0	0	0.000125016	0	0.000142871	0	0	0	0.000436512	0	0	0	0	0	0	0.000419911	0	0	0.000226173	0.000431648	0.000285796	0	0	0	0	0	7.8254e-05
Defluviitaleaceae_UCG-011	0.000271469	0.000202388	0	0.000417266	0	0	0	0	0	0	0.000190494	0	0	0	0	0	0	0	0	0.000324689	0	0.00030539	0	0	0	0	0.000381061	0	0.000197171	0	0.000209523	0	7.81078e-05
Pygmaiobacter	0	0	0	0	0	0	0	0	0	0	0	0	0	0	0.00247357	0	0	0	0	0	0	0	0	0	0	0	0	0	0	0	0	0	7.7299e-05
unclassified_k__norank_d__Bacteria	0	0	0	0	0	0.000318907	0	0	0	0	0.000190494	0.000309885	0	0.000419952	0	0	0	0	0	0	0	0	0	9.41176e-05	0.000226173	0.000215824	0.000142898	0.000217379	0	0	0.000261904	0	7.49229e-05
norank_f__Paludibacteraceae	0	0	0.00112849	0	0	0	0	0	0	0	0	0	0	0	0	0.00124849	0	0	0	0	0	0	0	0	0	0	0	0	0	0	0	0	7.42809e-05
norank_f__norank_o__norank_c__norank_p__WPS-2	0	0.000354179	0	0	0.00175167	0	0	0	0.000250031	0	0	0	0	0	0	0	0	0	0	0	0	0	0	0	0	0	0	0	0	0	0	0	7.36212e-05
Victivallis	0	0.000101194	0	0	0.000202115	0	0	0	0	0	0	0	0	0	0	0	0	0.000239981	0.000326776	0	0	0.000114521	0.000420673	0	0.000180938	0	0	0	0.000246463	0	0.000209523	0.000298098	7.31338e-05
Tyzzerella	0	0.000151791	0.000359066	0	0	0	0.000298737	0	0	0	0.000904848	0	0	0	0.000145504	0	0	0	0	0	0	0	0.000420673	0	0	0	0	0	0	0	0	0	7.12694e-05
Merdibacter	0.000226224	0	0	0.000278177	0	0	0.000810857	0	0	0	0	0	0	0	0	0	0	0	0	0	0.000206911	0	0	0	0	0.000215824	0.000190531	0	0	0	0.000209523	0	6.68139e-05
norank_f__Christensenellaceae	9.04895e-05	0.000151791	0	0	0	0	0	0	0.000250031	0.000316339	0.000190494	0	0	0	0	0	0	0	0	0	0	0.000267216	0	9.41176e-05	0	0.000172659	0.000190531	0	0	0	0.000104761	0	5.71385e-05
Lachnospiraceae_UCG-004	0	0	0	0	0	0	0	0	0	0	0	0	0	0	0	0	0	0	0	0	0	0	0	0	0	0	0	0	0	0	0	0.00172897	5.40303e-05
norank_f__Clostridium_methylpentosum_group	0.000452448	0	0	0	0	0	0	0	0	0	0.000238118	0	0	0	0	0	0	0	0	0	0	0	0	0	0.000226173	0	0	0	0.000443634	0	0.000366665	0	5.39699e-05
norank_f__vadinBE97	0	0	0	0	0	0	0	0	0	0	0	0	0	0	0	0	0	0	0	0	0	7.63475e-05	0.000540865	0	0.000135704	0	0	0	0.000197171	0	0.000419046	0.000238479	5.02379e-05
Frisingicoccus	0	0.000404776	0	0	0	0	0	0	0	0.000263616	0	0	0	0	0	0	0	0	0.000261421	0	0	0	0	0	0	8.63297e-05	0	0	0.000542219	0	0	0	4.86988e-05
norank_f__Coriobacteriales_Incertae_Sedis	0	0	0.00010259	0	0.000134744	0	0	0	0	0.000263616	0	0	0	0	0	0	0	0	0	0.00020293	0.000103455	0	0	0	0.000135704	8.63297e-05	0	0	0.000246463	0.000210497	0	0	4.64478e-05
norank_f__norank_o__Rhodospirillales	0	0	0	0	0	0	0	0	0	0	0	0	0	0.000839905	0.000339509	0	0	0	0	0	0	0	0	0	0	0.000258989	0	0	0	0	0	0	4.49501e-05
Ruminiclostridium	0	0	0	0	0	0.000136674	0	0	0	0	0	0	0	0	0	0	0	0	0.000196066	8.11721e-05	0	7.63475e-05	0	0	0.000361876	0	0	0	0	0	0	0.000476957	4.15342e-05
unclassified_f__Eggerthellaceae	0.000271469	0	0	0	0	0	0	0	0	0	0	0	0	0	0	0	0	0	0	0	0	0	0	0	0.000180938	0.000258989	0	0.000543449	0	0	0	0	3.92139e-05
norank_f__F082	0	0	0	0	0	0	0	0	0	0	0	0	0	0	0.000970026	0	0	0	0	0.000284102	0	0	0	0	0	0	0	0	0	0	0	0	3.91915e-05
Catenibacillus	0	0	0	0	0.000336859	0	0	0	0	0	0	0	0	0	0	0	0	0	0	0	0.000310366	0	0	0	0	0	0	0	0.000443634	0	0.000157142	0	3.9e-05
unclassified_c__Bacteroidia	0	0	0	0	0	0	0	0	0	0	0.00114297	0	0	0	0	0	0	0	0	0	0	0	0	0	0	0	0	0	0	0	0	0	3.57177e-05
Harryflintia	0	0	0	0	0	0	0	0	0.000312539	0	0	0	0.00013138	0.000139984	9.70026e-05	0.000129154	0	0	0	0	0	0	0	0	0	8.63297e-05	0	0	0	0	0	0.000178859	3.36015e-05
norank_f__norank_o__WCHB1-41	0	0	0	0	0	0	0	0	0	0	0	0	0	0	0.00101853	0	0	0	0	0	0	0	0	0	0	0	0	0	0	0	0	0	3.1829e-05
unclassified_f__Hungateiclostridiaceae	0	0	0	0.000556354	0	0.000273349	0	0	0	0	0	0	0	0	0	0	0	0	0	0	0	0	0	0	0	8.63297e-05	0	0	0	0	0	0	2.8626e-05
norank_f__norank_o__norank_c__norank_p__Firmicutes	0	0	0	0.000139089	0	0	0	0.000420017	0	0	0	0	0	0.000139984	0	0.000129154	0	0	0	0	0	0	0	0	0	8.63297e-05	0	0	0	0	0	0	2.85804e-05
Anaerofustis	0	0	0	0	0	0	0	0	0	0	0	0	0.00019707	0	0	0	0	0	0	0	0	0	0	0	0	0	0	0	0	0	0.000419046	0.000298098	2.85692e-05
Holdemania	0	0	0	0	0	0	0	0	0	0	0.000142871	0	0	0.000186646	0	0	0	0	0	0.000162344	0	0	0	0	0	0.000129495	9.52653e-05	0	0	0	0.000157142	0	2.73051e-05
unclassified_o__Erysipelotrichales	0	0	0	0	0	0.000318907	0	0	0.000125016	0	0	0	0	0	0	0	0	0	0	0	0	0	0.000120192	0	0	0.000172659	0	0	0	0	0	0	2.30242e-05
Candidatus_Soleaferrea	9.04895e-05	0	0	0	0	0	0	0	0	0	0	0	0	0	0	0.000344412	0	0	0	0	0	0	0	0	0.000135704	0	0	0	0	0.000140331	0	0	2.22168e-05
norank_f__norank_o__norank_c__Clostridia	0	0	0	0	0	0	0	0	0	0.000263616	0	0	0	0.000233307	0	0	0	0	0	0	0	0	0	0	0	0	0	0	0	0	0	0.000178859	2.11182e-05
Dielma	0	0	0	0.000139089	0.000134744	0.000136674	0	0	0	0	0	0	0.00013138	0	0	0	0	0	0	0	0	0	0	0	0	0.000129495	0	0	0	0	0	0	2.09807e-05
norank_f__Prevotellaceae	0	0	0	0	0	0	0	0	0	0.000263616	0	0	0	0	0	0	0	0	0.000326776	0	0	0	0	0	0	0	0	0	0	0	0	0	1.84497e-05
unclassified_f__Desulfovibrionaceae	0	0	0	0	0	0	0	0	0	0	0	0	0	0	0	0	0	0	0	0	0	0	0.000120192	0.000141176	0	0.000172659	0	0	0.000147878	0	0	0	1.81846e-05
UCG-007	0	0	0	0	0	0	0	0	0	0	0	0	0	0.000139984	0	0	0	0	0	0	0	0	0	0	0.000135704	0	0.000285796	0	0	0	0	0	1.75464e-05
Aeriscardovia	0	0	0	0	0	0	0	0.000300012	0	0	0	0	0	0	0.000194005	0	0	0	0	0	0	0	0	0	0	0	0	0	0	0	0	0	1.5438e-05
Caproiciproducens	0	0	0	0	0	0	0	0	0	0	0	0	0.00019707	0	0.000145504	0.000129154	0	0	0	0	0	0	0	0	0	0	0	0	0	0	0	0	1.47415e-05
Erysipelotrichaceae_UCG-003	0	0	0	0	0	0	0	0	0	0	0	0	0.000459831	0	0	0	0	0	0	0	0	0	0	0	0	0	0	0	0	0	0	0	1.43697e-05
unclassified_p__Firmicutes	0	0	0	0.000185451	0	0	0	0	0	0	0	0	0	0	0	0	0	0	0	8.11721e-05	0	0	0	0	0	8.63297e-05	0	0	0	0	0	0	1.10298e-05
Hydrogenoanaerobacterium	9.04895e-05	0	0	0	0	0	0	0	0	0	0	0.000103295	0	0	9.70026e-05	0	0	0	0	0	0	0	0	0	0	0	0	0	0	0	0	0	9.0871e-06
Christensenella	0	0	0	0.000139089	0	0	0	0	0	0	0	0	0	0	0	0	0	0	0	0	0	0.000114521	0	0	0	0	0	0	0	0	0	0	7.92531e-06
norank_f__Mitochondria	0	0	0	0	0	0	0	0	0	0	0	0	0	0	0	0	0	0	0	0	0	0	0	0	0	0.000215824	0	0	0	0	0	0	6.74451e-06
DEV114	0	0	0	0	0	0	0	0	0.000187523	0	0	0	0	0	0	0	0	0	0	0	0	0	0	0	0	0	0	0	0	0	0	0	5.86011e-06
CAG-352	0	0	0	0.000185451	0	0	0	0	0	0	0	0	0	0	0	0	0	0	0	0	0	0	0	0	0	0	0	0	0	0	0	0	5.79535e-06
Angelakisella	0	0	0	0	0	0	0	0	0	0	0	0	0	0	0	0	0	0	0	0	0	0	0	0	0	0.000172659	0	0	0	0	0	0	5.39561e-06
Candidatus_Arthromitus	0	0	0	0	0	0	0	0	0	0	0	0	0	0	0	0	0	0	0	0	0	0	0	0	0	0	0	0.000163035	0	0	0	0	5.09483e-06
unclassified_o__Burkholderiales	0	0	0	0	0	0.000136674	0	0	0	0	0	0	0	0	0	0	0	0	0	0	0	0	0	0	0	0	0	0	0	0	0	0	4.27107e-06
unclassified_f__Syntrophomonadaceae	0	0	0	0	0	0	0	0	0	0	0	0	0	0	0	0	0	0	0.00013071	0	0	0	0	0	0	0	0	0	0	0	0	0	4.0847e-06
Lachnospiraceae_NC2004_group	0	0	0.00010259	0	0	0	0	0	0	0	0	0	0	0	0	0	0	0	0	0	0	0	0	0	0	0	0	0	0	0	0	0	3.20595e-06
UCG-002	0	0	0	0	0	0	0	0	0	0	0	0	0	0	0	0	0	0	0	0	0	0	0	0	0	0	9.52653e-05	0	0	0	0	0	2.97704e-06
Novosphingobium	0	0	0	0	0	0	0	0	0	0	0	0	0	0	0	0	0	0	0	8.11721e-05	0	0	0	0	0	0	0	0	0	0	0	0	2.53663e-06
Bilophila	0	0	0	0	0	0	0	0	0	0	0	0	0	0	0	0	0	0	0	0	0	0	0	0	0	0	0	0	0	0	0	0	0
Tuzzerella	0	0	0	0	0	0	0	0	0	0	0	0	0	0	0	0	0	0	0	0	0	0	0	0	0	0	0	0	0	0	0	0	0
unclassified_f__Barnesiellaceae	0	0	0	0	0	0	0	0	0	0	0	0	0	0	0	0	0	0	0	0	0	0	0	0	0	0	0	0	0	0	0	0	0
unclassified_f__Selenomonadaceae	0	0	0	0	0	0	0	0	0	0	0	0	0	0	0	0	0	0	0	0	0	0	0	0	0	0	0	0	0	0	0	0	0
Rikenella	0	0	0	0	0	0	0	0	0	0	0	0	0	0	0	0	0	0	0	0	0	0	0	0	0	0	0	0	0	0	0	0	0
Clostridium_sensu_stricto_1	0	0	0	0	0	0	0	0	0	0	0	0	0	0	0	0	0	0	0	0	0	0	0	0	0	0	0	0	0	0	0	0	0
UCG-008	0	0	0	0	0	0	0	0	0	0	0	0	0	0	0	0	0	0	0	0	0	0	0	0	0	0	0	0	0	0	0	0	0
unclassified_f__Acidaminococcaceae	0	0	0	0	0	0	0	0	0	0	0	0	0	0	0	0	0	0	0	0	0	0	0	0	0	0	0	0	0	0	0	0	0
Paraprevotella	0	0	0	0	0	0	0	0	0	0	0	0	0	0	0	0	0	0	0	0	0	0	0	0	0	0	0	0	0	0	0	0	0
unclassified_o__Coriobacteriales	0	0	0	0	0	0	0	0	0	0	0	0	0	0	0	0	0	0	0	0	0	0	0	0	0	0	0	0	0	0	0	0	0
Anaerosporobacter	0	0	0	0	0	0	0	0	0	0	0	0	0	0	0	0	0	0	0	0	0	0	0	0	0	0	0	0	0	0	0	0	0
unclassified_f__Synergistaceae	0	0	0	0	0	0	0	0	0	0	0	0	0	0	0	0	0	0	0	0	0	0	0	0	0	0	0	0	0	0	0	0	0
Flavobacterium	0	0	0	0	0	0	0	0	0	0	0	0	0	0	0	0	0	0	0	0	0	0	0	0	0	0	0	0	0	0	0	0	0
Mycoplasma	0	0	0	0	0	0	0	0	0	0	0	0	0	0	0	0	0	0	0	0	0	0	0	0	0	0	0	0	0	0	0	0	0
Campylobacter	0	0	0	0	0	0	0	0	0	0	0	0	0	0	0	0	0	0	0	0	0	0	0	0	0	0	0	0	0	0	0	0	0
norank_f__norank_o__Izemoplasmatales	0	0	0	0	0	0	0	0	0	0	0	0	0	0	0	0	0	0	0	0	0	0	0	0	0	0	0	0	0	0	0	0	0
unclassified_c__Negativicutes	0	0	0	0	0	0	0	0	0	0	0	0	0	0	0	0	0	0	0	0	0	0	0	0	0	0	0	0	0	0	0	0	0
Prevotellaceae_UCG-004	0	0	0	0	0	0	0	0	0	0	0	0	0	0	0	0	0	0	0	0	0	0	0	0	0	0	0	0	0	0	0	0	0
Roseburia	0	0	0	0	0	0	0	0	0	0	0	0	0	0	0	0	0	0	0	0	0	0	0	0	0	0	0	0	0	0	0	0	0
Staphylococcus	0	0	0	0	0	0	0	0	0	0	0	0	0	0	0	0	0	0	0	0	0	0	0	0	0	0	0	0	0	0	0	0	0
Sporobacter	0	0	0	0	0	0	0	0	0	0	0	0	0	0	0	0	0	0	0	0	0	0	0	0	0	0	0	0	0	0	0	0	0
Sediminibacterium	0	0	0	0	0	0	0	0	0	0	0	0	0	0	0	0	0	0	0	0	0	0	0	0	0	0	0	0	0	0	0	0	0
Akkermansia	0	0	0	0	0	0	0	0	0	0	0	0	0	0	0	0	0	0	0	0	0	0	0	0	0	0	0	0	0	0	0	0	0

## Sheet: S5
Table S5 Co-abundance groups (CAGs) enriched in the high weight chickens or low weight chickens
CAG	ASV	phylum	Family	Genus
CAG6	ASV5	Firmicutes	Acidaminococcaceae	Phascolarctobacterium
CAG6	ASV87	Firmicutes	Lachnospiraceae	Blautia
CAG6	ASV127	Firmicutes	Lachnospiraceae	GCA-900066575
CAG6	ASV168	Firmicutes	Lachnospiraceae	Ruminococcus_torques_group
CAG6	ASV347	Firmicutes	Lachnospiraceae	Shuttleworthia
CAG6	ASV35	5	Lachnospiraceae	unclassified_f__Lachnospiraceae
CAG6	ASV74	Firmicutes	Lachnospiraceae	unclassified_f__Lachnospiraceae
CAG6	ASV152	Firmicutes	Lachnospiraceae	unclassified_f__Lachnospiraceae
CAG6	ASV190	Firmicutes	Lachnospiraceae	unclassified_f__Lachnospiraceae
CAG6	ASV174	Firmicutes	Lachnospiraceae	unclassified_f__Lachnospiraceae
CAG6	ASV210	Firmicutes	Lachnospiraceae	unclassified_f__Lachnospiraceae
CAG6	ASV203	Firmicutes	Lachnospiraceae	unclassified_f__Lachnospiraceae
CAG6	ASV222	Firmicutes	Lachnospiraceae	unclassified_f__Lachnospiraceae
CAG6	ASV366	Firmicutes	Lachnospiraceae	unclassified_f__Lachnospiraceae
CAG6	ASV339	Firmicutes	norank_o__Clostridia_UCG-014	norank_f__norank_o__Clostridia_UCG-014
CAG6	ASV105	Firmicutes	norank_o__Clostridia_UCG-014	norank_f__norank_o__Clostridia_UCG-014
CAG6	ASV144	Firmicutes	Oscillospiraceae	NK4A214_group
CAG6	ASV342	Firmicutes	Peptococcaceae	Peptococcus
CAG6	ASV107	Firmicutes	Ruminococcaceae	Faecalibacterium
CAG6	ASV65	Firmicutes	Ruminococcaceae	unclassified_f__Ruminococcaceae
CAG6	ASV661	Firmicutes	Ruminococcaceae	norank_f__Ruminococcaceae
CAG6	ASV302	Bacteroidota	unclassified_o__Bacteroidales	unclassified_o__Bacteroidales
CAG9	ASV20	Firmicutes	Lachnospiraceae	Ruminococcus_torques_group
CAG9	ASV557	Firmicutes	Lachnospiraceae	unclassified_f__Lachnospiraceae
CAG9	ASV66	Firmicutes	Oscillospiraceae	Flavonifractor
CAG9	ASV493	Bacteroidota	Marinifilaceae	Odoribacter
CAG9	ASV478	Bacteroidota	Marinifilaceae	Odoribacter
CAG9	ASV131	Bacteroidota	Barnesiellaceae	Barnesiella
CAG16	ASV94	Actinobacteriota	Atopobiaceae	Olsenella
CAG16	ASV619	Actinobacteriota	Coriobacteriaceae	Collinsella
CAG16	ASV12	Bacteroidota	Bacteroidaceae	Bacteroides
CAG16	ASV82	Bacteroidota	Tannerellaceae	Parabacteroides
CAG16	ASV118	Bacteroidota	Tannerellaceae	Parabacteroides
CAG16	ASV42	Bacteroidota	Tannerellaceae	Parabacteroides
CAG16	ASV270	Campilobacterota	Helicobacteraceae	Helicobacter
CAG16	ASV501	Firmicutes	Erysipelotrichaceae	Faecalitalea
CAG16	ASV482	Firmicutes	Lachnospiraceae	Lachnoclostridium
CAG16	ASV509	Firmicutes	Lachnospiraceae	Lachnoclostridium
CAG16	ASV677	Firmicutes	Lachnospiraceae	unclassified_f__Lachnospiraceae
CAG16	ASV795	Firmicutes	norank_o__Clostridia_UCG-014	norank_f__norank_o__Clostridia_UCG-014
CAG16	ASV615	Firmicutes	Oscillospiraceae	NK4A214_group
CAG16	ASV639	Firmicutes	Oscillospiraceae	norank_f__Oscillospiraceae
CAG16	ASV438	Firmicutes	Ruminococcaceae	DTU089
CAG16	ASV350	Firmicutes	Ruminococcaceae	norank_f__Ruminococcaceae
CAG17	ASV279	Actinobacteriota	Bifidobacteriaceae	Bifidobacterium
CAG17	ASV428	Actinobacteriota	Coriobacteriaceae	Enorma
CAG17	ASV417	Actinobacteriota	Coriobacteriaceae	Enorma
CAG17	ASV165	Bacteroidota	Barnesiellaceae	Barnesiella
CAG17	ASV495	Bacteroidota	Barnesiellaceae	Barnesiella
CAG17	ASV26	Bacteroidota	Rikenellaceae	Alistipes
CAG17	ASV391	Bacteroidota	Rikenellaceae	Alistipes
CAG17	ASV6	Bacteroidota	unclassified_o__Bacteroidales	unclassified_o__Bacteroidales
CAG17	ASV230	Deferribacterota	Deferribacteraceae	Mucispirillum
CAG17	ASV37	Desulfobacterota	Desulfovibrionaceae	Desulfovibrio
CAG17	ASV155	Firmicutes	Anaerovoracaceae	Eubacterium_nodatum_group
CAG17	ASV100	Firmicutes	Eubacterium_coprostanoligenes_group	norank_f__Eubacterium_coprostanoligenes_group
CAG17	ASV642	Firmicutes	Lachnospiraceae	Ruminococcus_torques_group
CAG17	ASV409	Firmicutes	Lachnospiraceae	Sellimonas
CAG17	ASV171	Firmicutes	Lachnospiraceae	Sellimonas
CAG17	ASV755	Firmicutes	Lachnospiraceae	unclassified_f__Lachnospiraceae
CAG17	ASV840	Firmicutes	Lachnospiraceae	unclassified_f__Lachnospiraceae
CAG17	ASV133	Firmicutes	Oscillospiraceae	Oscillibacter
CAG17	ASV730	Firmicutes	Oscillospiraceae	Oscillibacter
CAG17	ASV575	Firmicutes	Oscillospiraceae	norank_f__Oscillospiraceae
CAG17	ASV83	Firmicutes	Ruminococcaceae	Negativibacillus
CAG17	ASV412	Firmicutes	Ruminococcaceae	norank_f__Ruminococcaceae
CAG17	ASV486	Firmicutes	Ruminococcaceae	Faecalibacterium

## Sheet: S6
Table S6 The common differential bacteria groups by ASV, genus and CAG levels
Enrichment group	Genus	ASV	CAG
HC	Ruminococcus_torques_group	ASV20	CAG9
HC	Lachnoclostridium	ASV482	CAG16
HC	Alistipes	ASV26	CAG17
HC	Negativibacillus	ASV83	CAG17
HC	Sellimonas	ASV409	CAG17
HC	Sellimonas	ASV171	CAG17
LC	Phascolarctobacterium	ASV5	CAG6
